# Supplementary material for: Coronary Calcium Score for the Prediction of Asymptomatic Coronary Artery Disease in Patients With Ischemic Stroke
Source: PubMed Central journal article supplement (PMC7134382; doi:10.3389/fneur.2020.00206), 2020-03-27
Supplement: Data_Sheet_1.pdf [file Data_Sheet_1.pdf]

Supplement Table 1. Demographic characteristics of excluded and enrolled patients

|                              | Excluded patients<br>(N=3087) | Enrolled patients<br>(N=2658) | p       |
|------------------------------|-------------------------------|-------------------------------|---------|
| Age                          | 66.4 ± 13.9                   | 65.3 ± 11.2                   | 0.001   |
| Male                         | 1719 (55.8)                   | 1745 (65.7)                   | <0.0001 |
| Hypertension                 | 2226 (72.1)                   | 2023 (76.1)                   | 0.001   |
| Diabetes Mellitus            | 952 (30.8)                    | 874 (32.9)                    | 0.103   |
| Dyslipidemia                 | 325 (10.5)                    | 339 (12.8)                    | 0.01    |
| Smoking                      | 544 (17.6)                    | 725 (27.3)                    | <0.0001 |
| Valvular heart disease       | 218 (7.1)                     | 106 (4.0)                     | <0.0001 |
| Atrial fibrillation          | 725 (23.5)                    | 339 (12.8)                    | <0.0001 |
| Previous cerebral infarction | 624 (20.2)                    | 363 (13.7)                    | <0.0001 |
| Peripheral artery disease    | 123 (4.0)                     | 58 (2.2)                      | <0.0001 |
| Metabolic syndrome           | 1193 (38.6)                   | 1133 (42.6)                   | 0.002   |
| Initial systolic BP          | 156.1 ± 285.1                 | 155.7 ± 37.3                  | 0.933   |
| Initial diastolic BP         | 83.5 ± 16.5                   | 85.9 ± 15.8                   | <0.0001 |
| Laboratory findings          |                               |                               |         |
| ESR                          | 26.3 ± 24.0                   | 21.1 ± 20.9                   | <0.0001 |
| Fibrinogen                   | 331.3 ± 224.9                 | 309.9 ± 102.0                 | <0.0001 |
| Initial glucose              | 142.6 ± 66.3                  | 142.1 ± 60.7                  | 0.773   |
| HbA1c                        | 6.7 ± 4.1                     | 6.7 ± 3.0                     | 0.968   |
| Total cholesterol            | 170.3 ± 44.9                  | 183.2 ± 62.6                  | <0.0001 |
| Triglyceride                 | 115.9 ± 76.8                  | 128.5 ± 91.9                  | <0.0001 |
| LDL cholesterol              | 102.2 ± 41.6                  | 108.4 ± 35.5                  | <0.0001 |
| HDL cholesterol              | 42.9 ± 12.3                   | 42.3 ± 10.8                   | 0.061   |

Values are presented as mean ± standard deviation or number (%).

BP, Blood pressure; ESR, erythrocyte sedimentation rate; HbA1c, hemoglobin A1c; LDL, low density lipoprotein; HDL, high density lipoprotein

Supplement Table 2. Sensitivity and specificity of each cut-off point of the selection criteria for performing CAC scan to predict severe coronary artery disease.

| Criterion | Sensitivity | 95% CI      | Specificity | 95% CI       |
|-----------|-------------|-------------|-------------|--------------|
| >0        | 98.05       | 95.5 - 99.4 | 9.23        | 7.9 - 10.8   |
| >1        | 82.03       | 76.8 - 86.5 | 48.5        | 46.0 - 51.0  |
| >2        | 42.58       | 36.4 - 48.9 | 82.73       | 80.8 - 84.6  |
| >3        | 14.45       | 10.4 - 19.4 | 96.2        | 95.1 - 97.1  |
| >4        | 1.56        | 0.4 - 4.0   | 99.63       | 99.2 - 99.9  |
| >5        | 0           | 0.0 - 1.4   | 99.94       | 99.7 - 100.0 |

CI, confidence interval
